# Supplementary material for: g-C3N4promotes agro-ecosystem productivity: a case study for rice
Source: Royal Society of Chemistry journal article supplement (doi:10.1039/d3en00253e), 2023-01-01
Supplement: d3en00253e1.pdf [file d3en00253e1.pdf]

## **g-C<sub>3</sub>N<sub>4</sub> promotes agro-ecosystem productivity: a case study for rice**

Jiahui Cheng<sup>1,2</sup>, Xin Li<sup>1\*</sup>, Chenman Ding<sup>2</sup>, Yanfang Feng<sup>2</sup>, Pengfu Hou<sup>2</sup>, Lihong Xue<sup>2</sup>, Linzhang Yang<sup>2</sup> and Shiyong He<sup>1,2\*</sup>

1. Jiangsu Co-Innovation Center of Efficient Processing and Utilization of Forest Resources, College of Chemical Engineering, Key Laboratory of Forestry Genetics & Biotechnology (Ministry of Education), International Innovation Center for Forest Chemicals and Materials, Nanjing Forestry University, Nanjing 210037, People's Republic of China

2. Key Laboratory of Agro-Environment in Downstream of Yangtze Plain, National Agricultural Experiment Station for Agricultural Environment (Liu He), Key Laboratory for Combined Farming and Raising, Ministry of Agriculture and Rural Affairs; Institute of Agricultural Resources and Environment, Jiangsu Academy of Agricultural Sciences, Nanjing 210014, China

\*Corresponding Authors:

Xin Li, [xli@njfu.edu.cn](mailto:xli@njfu.edu.cn)

Shiyong He, [hshiyong@hotmail.com](mailto:hshiyong@hotmail.com)

Table S1 The fertilizer application amount of different treatments.

| Treatment Number | Material Description                       | Base fertilization<br>(Second day after transplantation) |                                               |                                                | tillering<br>fertilization<br>(Day 12 after<br>transplantation) | panicle<br>fertilization<br>(Day 42 after<br>transplantation) |
|------------------|--------------------------------------------|----------------------------------------------------------|-----------------------------------------------|------------------------------------------------|-----------------------------------------------------------------|---------------------------------------------------------------|
|                  |                                            | Urea<br>(g·m <sup>-2</sup> )                             | Potassium<br>chloride<br>(g·m <sup>-2</sup> ) | Dicalcium<br>phosphate<br>(g·m <sup>-2</sup> ) | Urea<br>(g·m <sup>-2</sup> )                                    | Urea<br>(g·m <sup>-2</sup> )                                  |
| CKU              | -                                          | 7.2                                                      | 30.62                                         | 20.05                                          | 7.2                                                             | 9.6                                                           |
| CN-5             | 0.05% g-<br>C <sub>3</sub> N <sub>4</sub>  | 7.2                                                      | 30.62                                         | 20.05                                          | 7.2                                                             | 9.6                                                           |
| CN-20            | 0.2% g-<br>C <sub>3</sub> N <sub>4</sub>   | 7.2                                                      | 30.62                                         | 20.05                                          | 7.2                                                             | 9.6                                                           |
| FCN-5            | 0.05% Fe-<br>C <sub>3</sub> N <sub>4</sub> | 7.2                                                      | 30.62                                         | 20.05                                          | 7.2                                                             | 9.6                                                           |
| FCN-20           | 0.2% Fe-<br>C <sub>3</sub> N <sub>4</sub>  | 7.2                                                      | 30.62                                         | 20.05                                          | 7.2                                                             | 9.6                                                           |

## TXT S1

Rice in the soil column experiment was grown in the semi-open shed (part of outdoor cultivation) without additional temperature and light control (Fig. S1); Rice planting is from June 23 to October 30, 2021, details of temperature and light are available on the China Meteorological Network (<http://www.weather.com.cn/>).

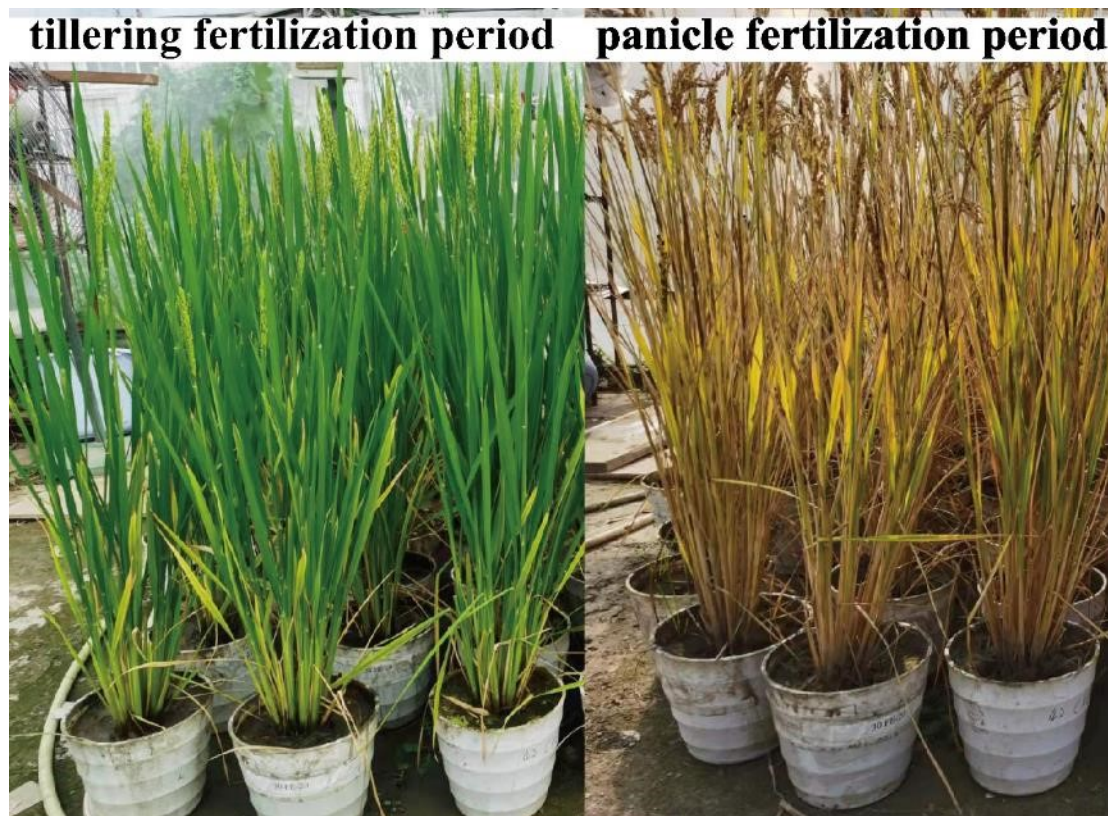

**Figure S1.** Rice growth pictures, left at tillering fertilization period, right at panicle fertilization period.

## **TXT S2**

Plant growth and yield indicators: three parallel measurements per treatment, repeated three times; where the SPAD measurement was averaged over three different sections on the third or fourth fully expanded leaf located at the top of the plant; rice plant enzyme activity was extracted by grinding in an ice bath using a 0.01M phosphate buffer solution at a plant weight to buffer mass of 1:10 and 4°C The extracts were obtained by centrifugation and three parallel samples of each treatment were determined. TN and TP were converted from organic nitrogen and organic phosphorus to inorganic ammonium salts and inorganic phosphorus in plants passing through a 0.25 mm screen by high temperature digestion with sulphuric acid-hydrogen peroxide and then determined by acid-base titration (nitrogen titrator) and molybdenum blue ascorbic acid (UV spectrophotometer), respectively, with three parallel samples per treatment.

### **TXT S3**

For the determination of surface water, three parallels for each treatment were carried out. COD was determined using the hash boiling method, using potassium dichromate as the oxidising agent and sulphuric acid at 150°C on fresh water samples, and determined using a spectrophotometer.  $\text{NH}_4^+$ -N and  $\text{NO}_3^-$ -N water samples were filtered through qualitative filter paper and determined using a flow analyzer.

Soil was also determined in three parallel for each treatment. pH was determined using a pH meter on soil passing through a 2 mm screen with  $\text{CO}_2$ -free water at 1:2.5 (w/v); SOM was determined using soil passing through a 0.149 mm screen with sulphuric acid and potassium dichromate in an oil bath at 180°C, boiled for five minutes and titrated using the indicator o-phenanthroline and ferrous sulphate. Total soil nitrogen was determined using 0.25 mm air-dried soil with sulphuric acid and an extinction catalyst at high temperature until off-white using a nitrogen tester, while TP was determined using 0.149 mm air-dried soil with concentrated sulphuric acid and perchloric acid until white, then using the molybdenum blue ascorbic acid method (UV spectrophotometer). Fresh soil samples or fresh air-dried soil samples are used to ensure that soil enzyme activity is not affected.

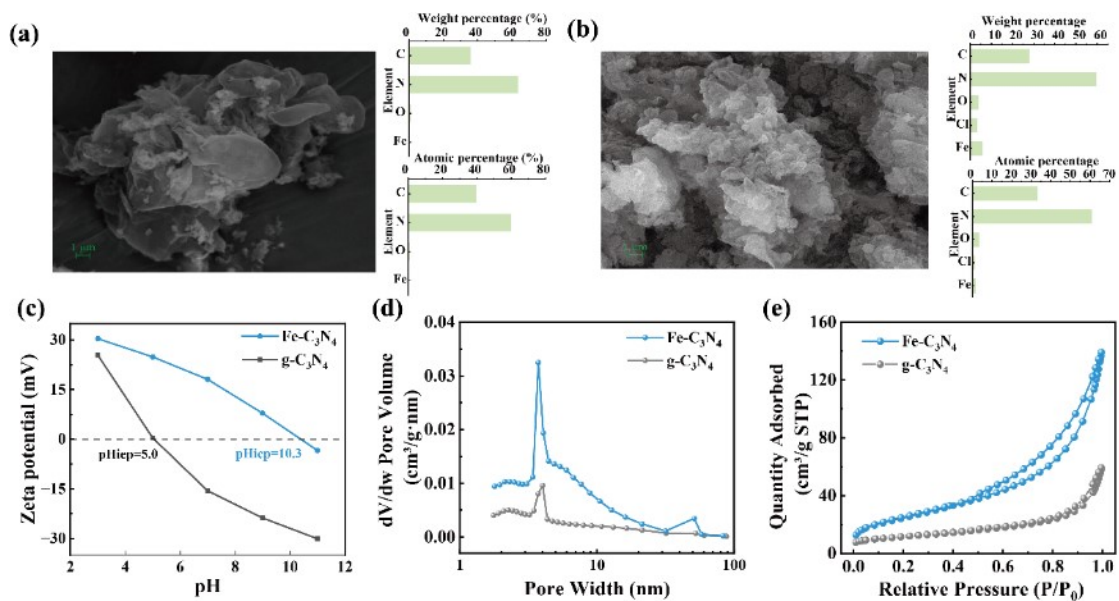

**Figure S2.** (a) and (b) the SEM of g-C<sub>3</sub>N<sub>4</sub> nanosheets and Fe-C<sub>3</sub>N<sub>4</sub> and the corresponding elemental compositions. (c) the zeta potential. (d) and (e) the pore size distribution and the adsorption-to-nitrogen isotherm.

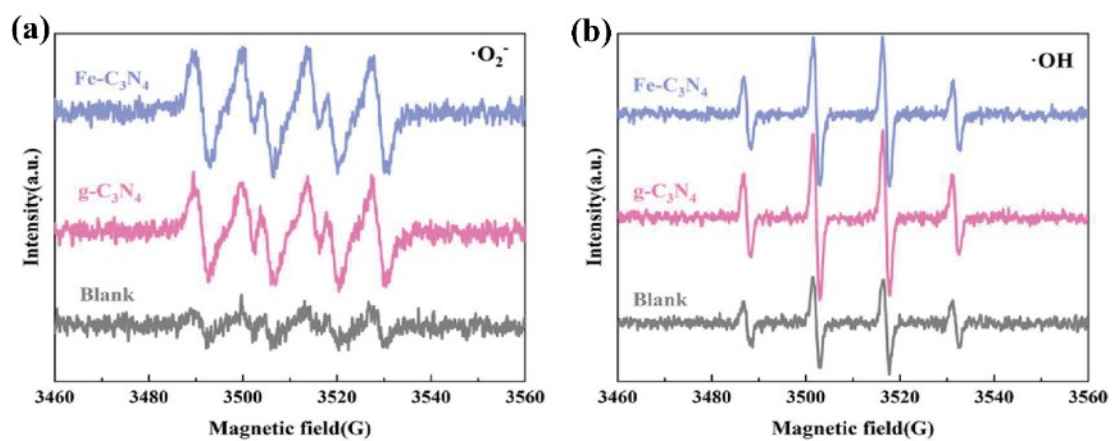

**Figure S3.** Changes of soil free radicals in each treatment group (a)  $\cdot\text{OH}$ , (b)  $\cdot\text{O}_2^-$

Table S2 The COD of different treatments.

| Treatment<br>Number | BF (mg·L <sup>-1</sup> ) |           |           | TF (mg·L <sup>-1</sup> ) |           |           | PF (mg·L <sup>-1</sup> ) |           |           |
|---------------------|--------------------------|-----------|-----------|--------------------------|-----------|-----------|--------------------------|-----------|-----------|
|                     | 0day                     | 2day      | 6day      | 0day                     | 2day      | 6day      | 0day                     | 2day      | 6day      |
| CKU                 | 53.8                     | 267.03    | 119.79    | 78.9                     | 168.5     | 35.0      | 29.41                    | 100.4     | 23.4      |
|                     | <b>7a</b>                | <b>a</b>  | <b>ab</b> | <b>3a</b>                | <b>3a</b> | <b>4a</b> | <b>bc</b>                | <b>3a</b> | <b>9a</b> |
| CN-5                | 53.8                     | 250.40    | 128.41    | 62.6                     | 106.3     | 45.9      | 46.73                    | 83.67     | 21.1      |
|                     | <b>3a</b>                | <b>ab</b> | <b>ab</b> | <b>7a</b>                | <b>3b</b> | <b>4a</b> | <b>a</b>                 | <b>ab</b> | <b>8a</b> |
| CN-20               | 59.0                     | 205.90    | 100.61    | 65.2                     | 159.8     | 42.2      | 33.07                    | 63.67     | 25.6      |
|                     | <b>0a</b>                | <b>b</b>  | <b>ab</b> | <b>2a</b>                | <b>7a</b> | <b>3a</b> | <b>b</b>                 | <b>b</b>  | <b>6a</b> |
| FCN-5               | 57.3                     | 236.23    | 142.87    | 67.1                     | 154.7     | 45.0      | 18.41                    | 85.67     | 18.7      |
|                     | <b>3a</b>                | <b>ab</b> | <b>b</b>  | <b>3a</b>                | <b>7a</b> | <b>6a</b> | <b>c</b>                 | <b>ab</b> | <b>4a</b> |
| FCN-20              | 64.2                     | 218.77    | 116.84    | 80.7                     | 103.2     | 34.8      | 40.17                    | 77.70     | 16.8      |
|                     | <b>7a</b>                | <b>ab</b> | <b>a</b>  | <b>3a</b>                | <b>3b</b> | <b>5a</b> | <b>ab</b>                | <b>ab</b> | <b>4a</b> |



Table S3 The  $\text{NH}_4^+$  of different treatments.

| Treatment | BF ( $\text{mg}\cdot\text{L}^{-1}$ ) |       | TF ( $\text{mg}\cdot\text{L}^{-1}$ ) |       | PF ( $\text{mg}\cdot\text{L}^{-1}$ ) |       |
|-----------|--------------------------------------|-------|--------------------------------------|-------|--------------------------------------|-------|
| Number    | 2day                                 | 6day  | 2day                                 | 6day  | 2day                                 | 6day  |
| CKU       | 30.63a                               | 0.63a | 19.34a                               | 0.19a | 33.30b                               | 0.14b |
| CN-5      | 33.57a                               | 0.15a | 18.83a                               | 0.38a | 36.8ab                               | 0.33a |
| CN-20     | 39.91a                               | 0.18a | 22.83a                               | 0.23a | 47.20a                               | 0.33a |
| FCN-5     | 35.70a                               | 0.35a | 23.97a                               | 0.66a | 31.53b                               | 0.15b |
| FCN-20    | 28.20a                               | 0.69a | 18.17a                               | 0.25a | 27.23b                               | 0.03c |

Table S4 The  $\text{NO}_3^-$  of different treatments.

| Treatment | BF ( $\text{mg}\cdot\text{L}^{-1}$ ) |       | TF ( $\text{mg}\cdot\text{L}^{-1}$ ) |       | PF ( $\text{mg}\cdot\text{L}^{-1}$ ) |       |
|-----------|--------------------------------------|-------|--------------------------------------|-------|--------------------------------------|-------|
| Number    | 2day                                 | 6day  | 2day                                 | 6day  | 2day                                 | 6day  |
| CKU       | 0.47bc                               | 0.13a | 0.20b                                | 0.14a | 0.27a                                | 0.08a |
| CN-5      | 0.53ab                               | 0.16a | 0.27b                                | 0.17a | 0.20a                                | 0.06a |
| CN-20     | 0.53ab                               | 0.18a | 0.30ab                               | 0.18a | 0.23a                                | 0.06a |
| FCN-5     | 0.40c                                | 0.23a | 0.37ab                               | 0.16a | 0.23a                                | 0.08a |
| FCN-20    | 0.60a                                | 0.27a | 0.47a                                | 0.20a | 0.23a                                | 0.07a |
